# Supplementary material for: The origin and role of biological rock crusts in rocky desert weathering
Source: Copernicus journal article supplement (doi:10.5194/bg-16-1133-2019), 2019-03-19
Supplement: Supplementary file 1 [file Supplementary_information.pdf › Supplementary/Supplementary_information.pdf]

## ***Supplementary information***

**Figure S1.** Geographical location of the study sites. Isoclines on the map showing aridity index (P/PET). The pictures show the sparsely vegetated rocky slopes at the arid site (Sede Boqer) and the bare rocky slopes at the hyperarid site (Uvda Valley).

**Table S1.** Characteristics of the two sampling sites (below).

**Table S2.** Geological parameters of the subjected lithologies.

**Table S3.** Bacterial richness and diversity estimates of the samples (separate spreadsheet file).

**Table S4.** Variance partitioning and testing of the differences in the bacterial communities between the samples (separate spreadsheet file).

**Table S5.** Differences in phyla and order composition between the sample types tested (separate spreadsheet file).

**Table S1. Characteristics of the two sampling sites**

| Parameter                                           | Arid site<br>(Sede-Boqer)                                                                                        | Hyperarid site<br>(Uvda Valley)         | Reference                              |
|-----------------------------------------------------|------------------------------------------------------------------------------------------------------------------|-----------------------------------------|----------------------------------------|
| Elevation (m.a.s.l)                                 | 400-700                                                                                                          | 400-500                                 |                                        |
| Annual rain precipitation (P; mm yr <sup>-1</sup> ) | 80-120                                                                                                           | 10-20                                   | (Goldreich, 2013)                      |
| Potential evaporation (PET; mm)                     | 2000                                                                                                             | 4000                                    | (Bruins, 2012)                         |
| Aridity Index (P/PET)                               | Arid (0.05)                                                                                                      | Hyperarid (0.005)                       |                                        |
| Bedrock units                                       | Late Cretaceous to Tertiary age; composed of marine sediments, mainly limestone, dolomite, chalk, marl and chert |                                         | (Wieler et al., 2016)                  |
| Distance to nearest sea                             | Mediterranean Sea – 80 km; Red Sea – 140 km                                                                      | Mediterranean Sea –160 km; Red Sea – 40 |                                        |
| Rain source                                         | Mediterranean Sea and Red Sea Trough                                                                             |                                         | (Goldreich, 2013)                      |
| Wet season                                          | December to March                                                                                                |                                         |                                        |
| Mean annual rainy days                              | 27                                                                                                               | 18                                      |                                        |
| Mean annual dew days                                | 200                                                                                                              | NA                                      | (http://www.ims.gov.il/IMSEng/CLIMATE) |
| Mean annual dew precipitation (mm)                  | 20                                                                                                               | NA                                      |                                        |
| Dewpoint (°C)                                       | 7-14                                                                                                             | NA                                      |                                        |
| Mean annual foggy days                              | NA                                                                                                               | 3                                       |                                        |
| Mean annual temperature (°C)                        | 24                                                                                                               | 31                                      |                                        |
| Mean annual relative humidity (%)                   | 40                                                                                                               | NA                                      |                                        |

**Table S2: Geological parameters of the subjected lithologies.**

| Rock properties                                       | Limestone (arid; Shivta Formation) |         |        | Dolomite (hyperarid; Gerofit Formation) |         |        |
|-------------------------------------------------------|------------------------------------|---------|--------|-----------------------------------------|---------|--------|
|                                                       | Dolomite                           | Calcium | Quartz | Dolomite                                | Calcium | Quartz |
| BRC mineralogy (%)                                    | 0                                  | 95      | 3      | 90                                      | 2       | 1      |
| Host rock mineralogy (%)                              | 0                                  | 95      | 0      | 95                                      | 0       | 1      |
| Porosity (%)                                          | 13.5 ± 2.2                         |         |        | 8.25 ± 1.3                              |         |        |
| Permeability (miliDarcy)                              | 0.1 – 3.8                          |         |        | 0.05 – 0.41                             |         |        |
| Surface penetration resistance (kg cm <sup>-1</sup> ) | 100 – 365                          |         |        | 130 – 230                               |         |        |

## **References**

- Goldreich, Y. (2013). *Climate of Israel: observation, research and application*. Place of publication not identified: Springer.
- Bruins, H. J. (2012). Ancient desert agriculture in the Negev and climate-zone boundary changes during average, wet and drought years. *Journal of Arid Environments*, 86, 28–42.  
<https://doi.org/10.1016/j.jaridenv.2012.01.015>
- Wieler, N., Avni, Y., & Rosensaft, M. (2016). The significance of the geological strata on desert runoff agriculture: Indications for stable desert environment over the last 1600 years in southern Israel. *Journal of Arid Environments*, 135, 147–163.  
<https://doi.org/10.1016/j.jaridenv.2016.08.010>
