# Supplementary material for: The origin and role of biological rock crusts in rocky desert weathering
Source: Copernicus journal article supplement (doi:10.5194/bg-16-1133-2019), 2019-03-19
Supplement: Supplementary file [file bg-16-1133-2019-supplement-title-page.pdf › bg-16-1133-2019-supplement-title-page.pdf]

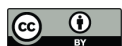

## *Supplement of*

# **The origin and role of biological rock crusts in rocky desert weathering**

**Nimrod Wieler et al.**

*Correspondence to:* Roey Angel ([roey.angel@bc.cas.cz](mailto:roey.angel@bc.cas.cz)) and Osnat Gillor ([gilloro@bgu.ac.i](mailto:gilloro@bgu.ac.i))

- [bg-16-1133-2019-supplement-title-page.pdf](#)
- Supplementary
  - [Fig\\_S1.png](#)
  - [Supplementary\\_information.pdf](#)
  - [Table\\_S3.ods](#)
  - [Table\\_S4.ods](#)
  - [Table\\_S5.ods](#)

The copyright of individual parts of the supplement might differ from the CC BY 4.0 License.
